# Supplementary material for: MBNL3 Acts as a Target of miR-302e to Facilitate Cell Proliferation, Invasion and Angiogenesis of Gastric Adenocarcinoma via AKT/VEGFA Pathway
Source: PubMed Central journal article supplement (PMC11294653; doi:10.4014/jmb.2401.01027), 2024-05-30

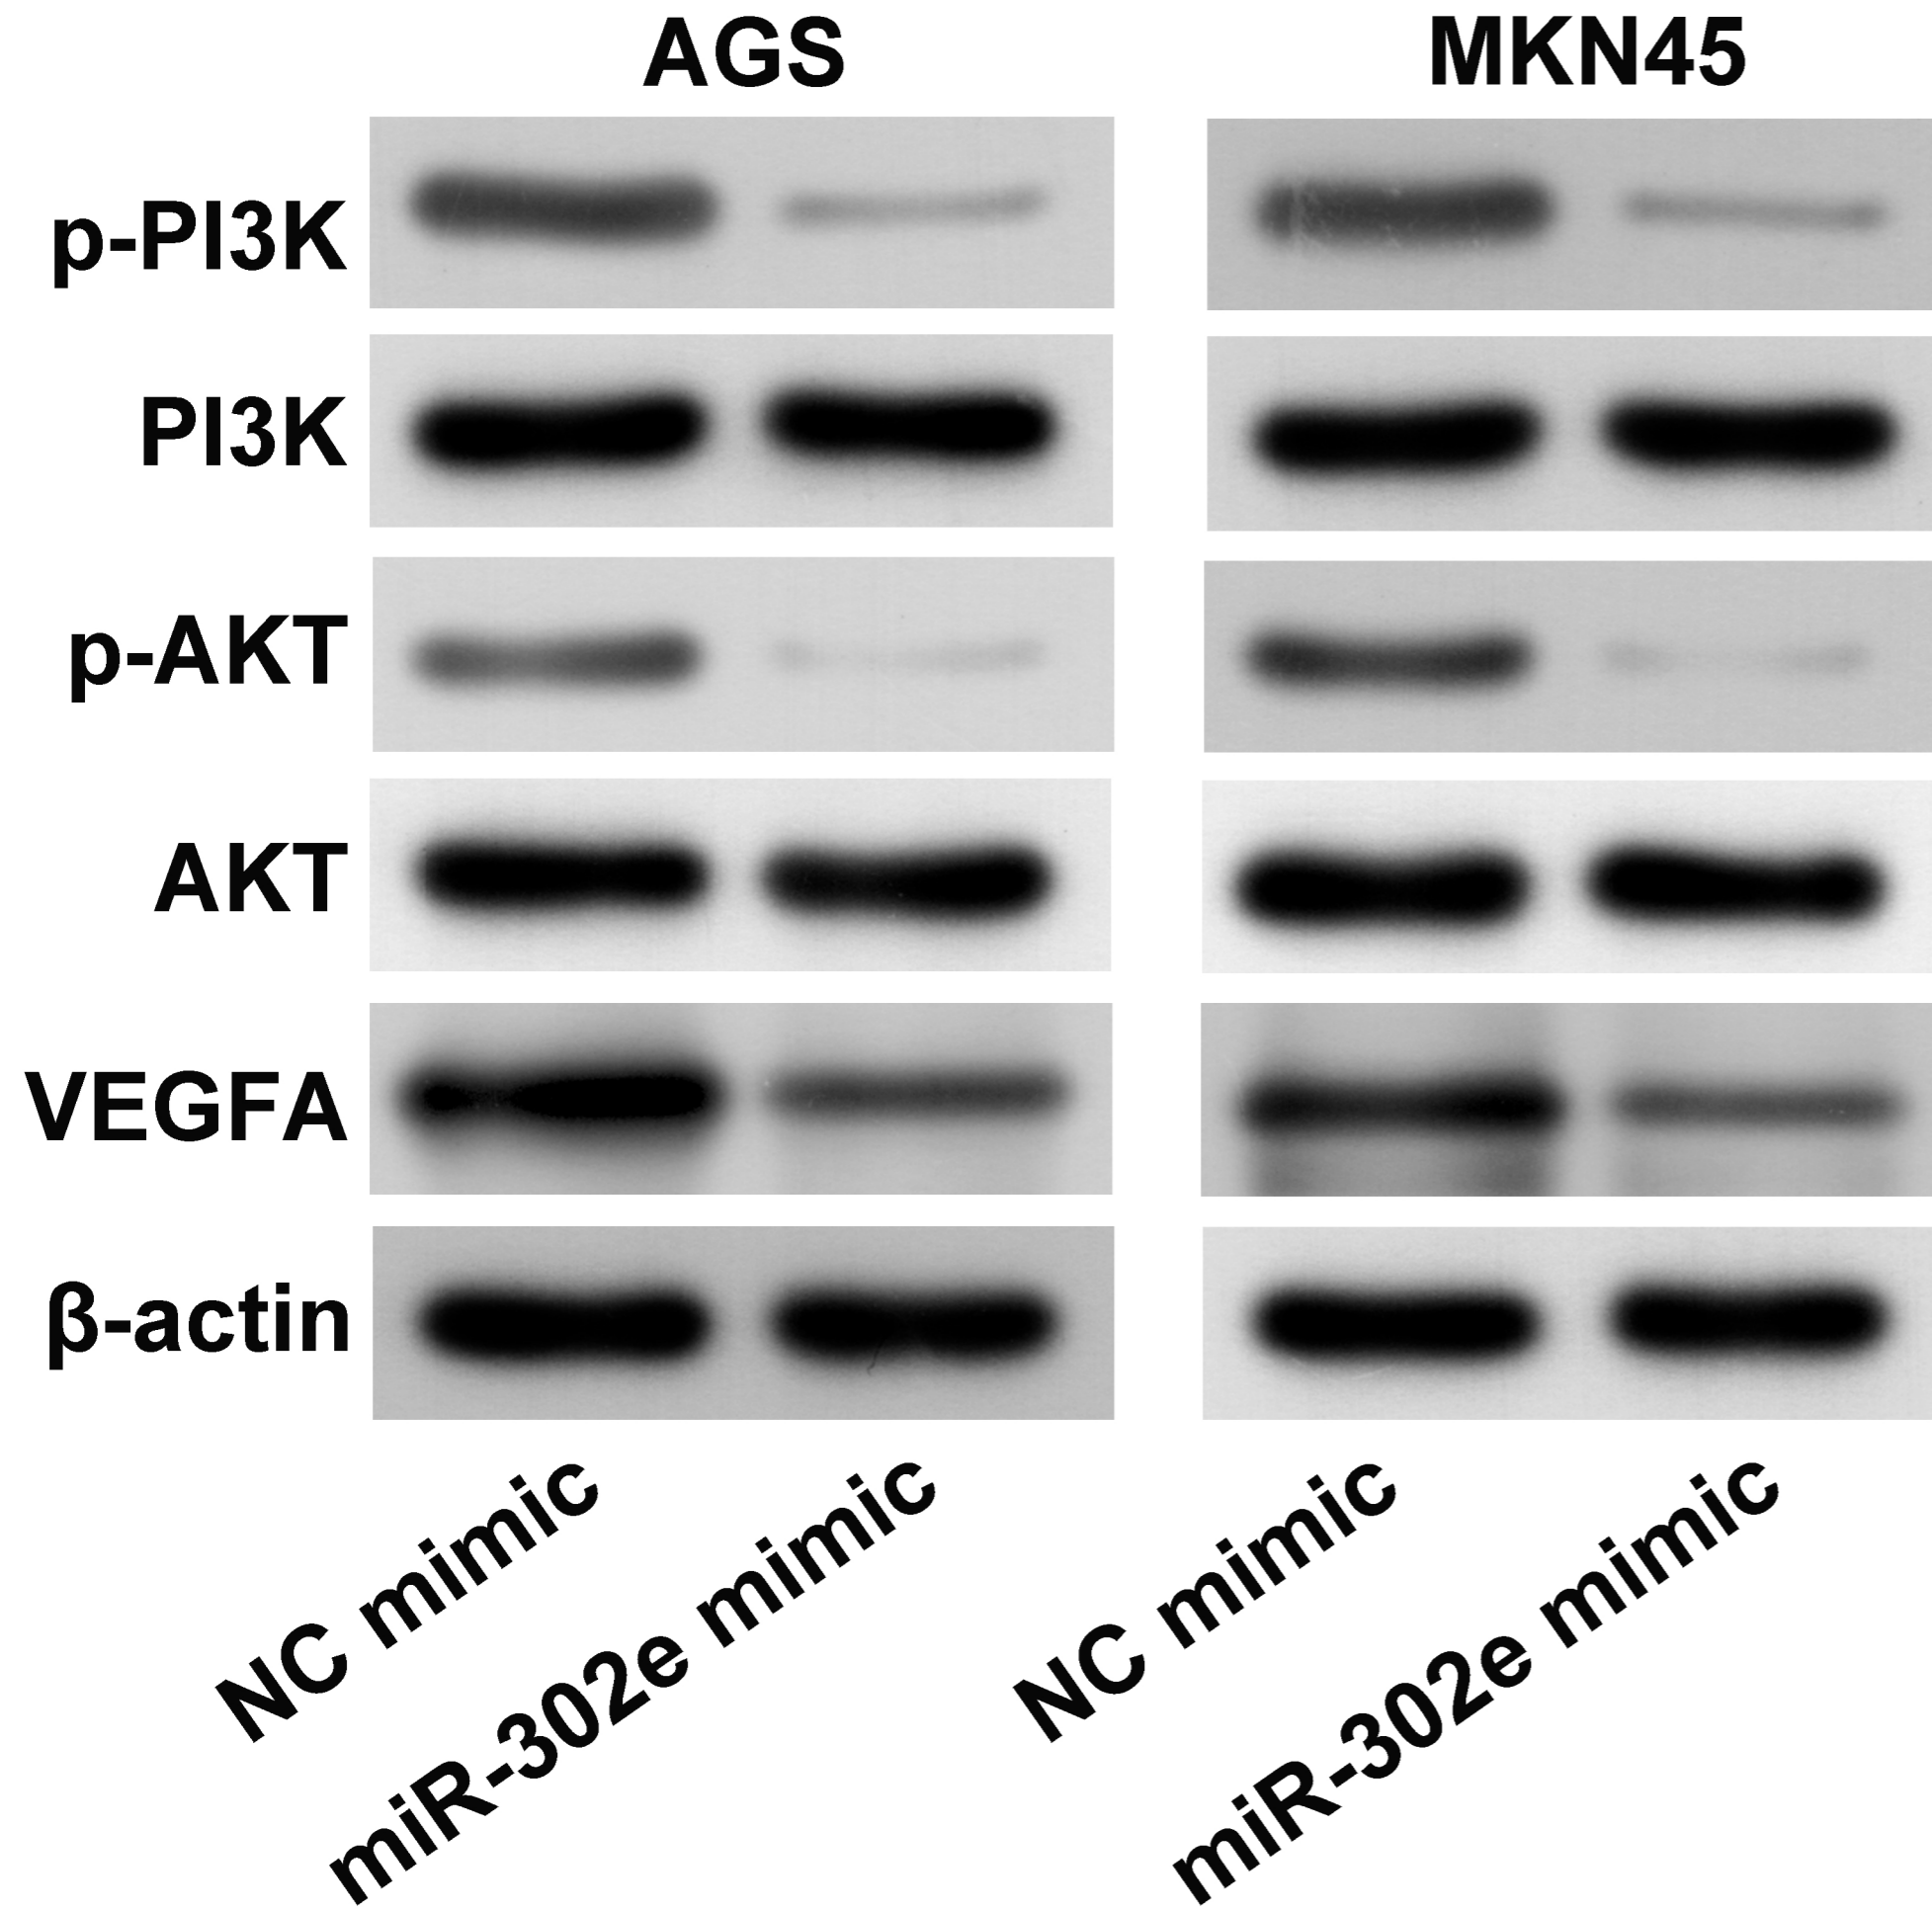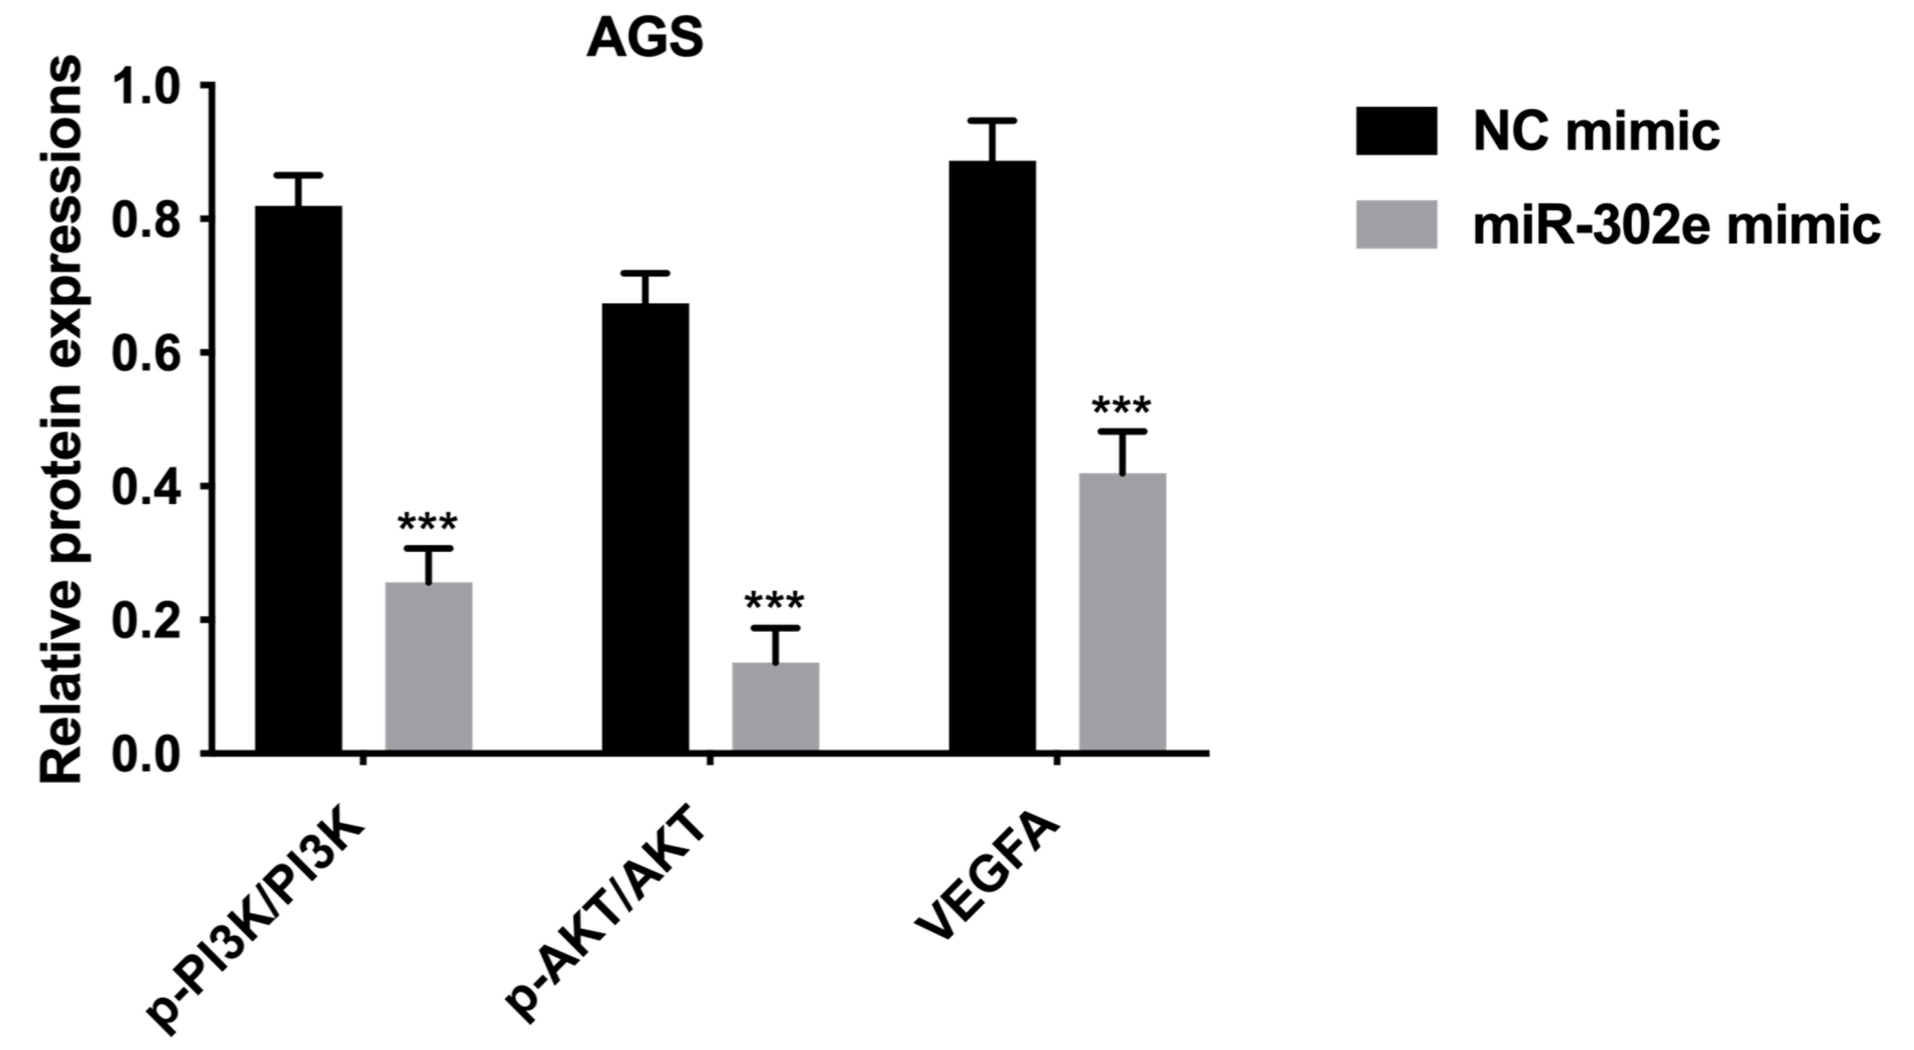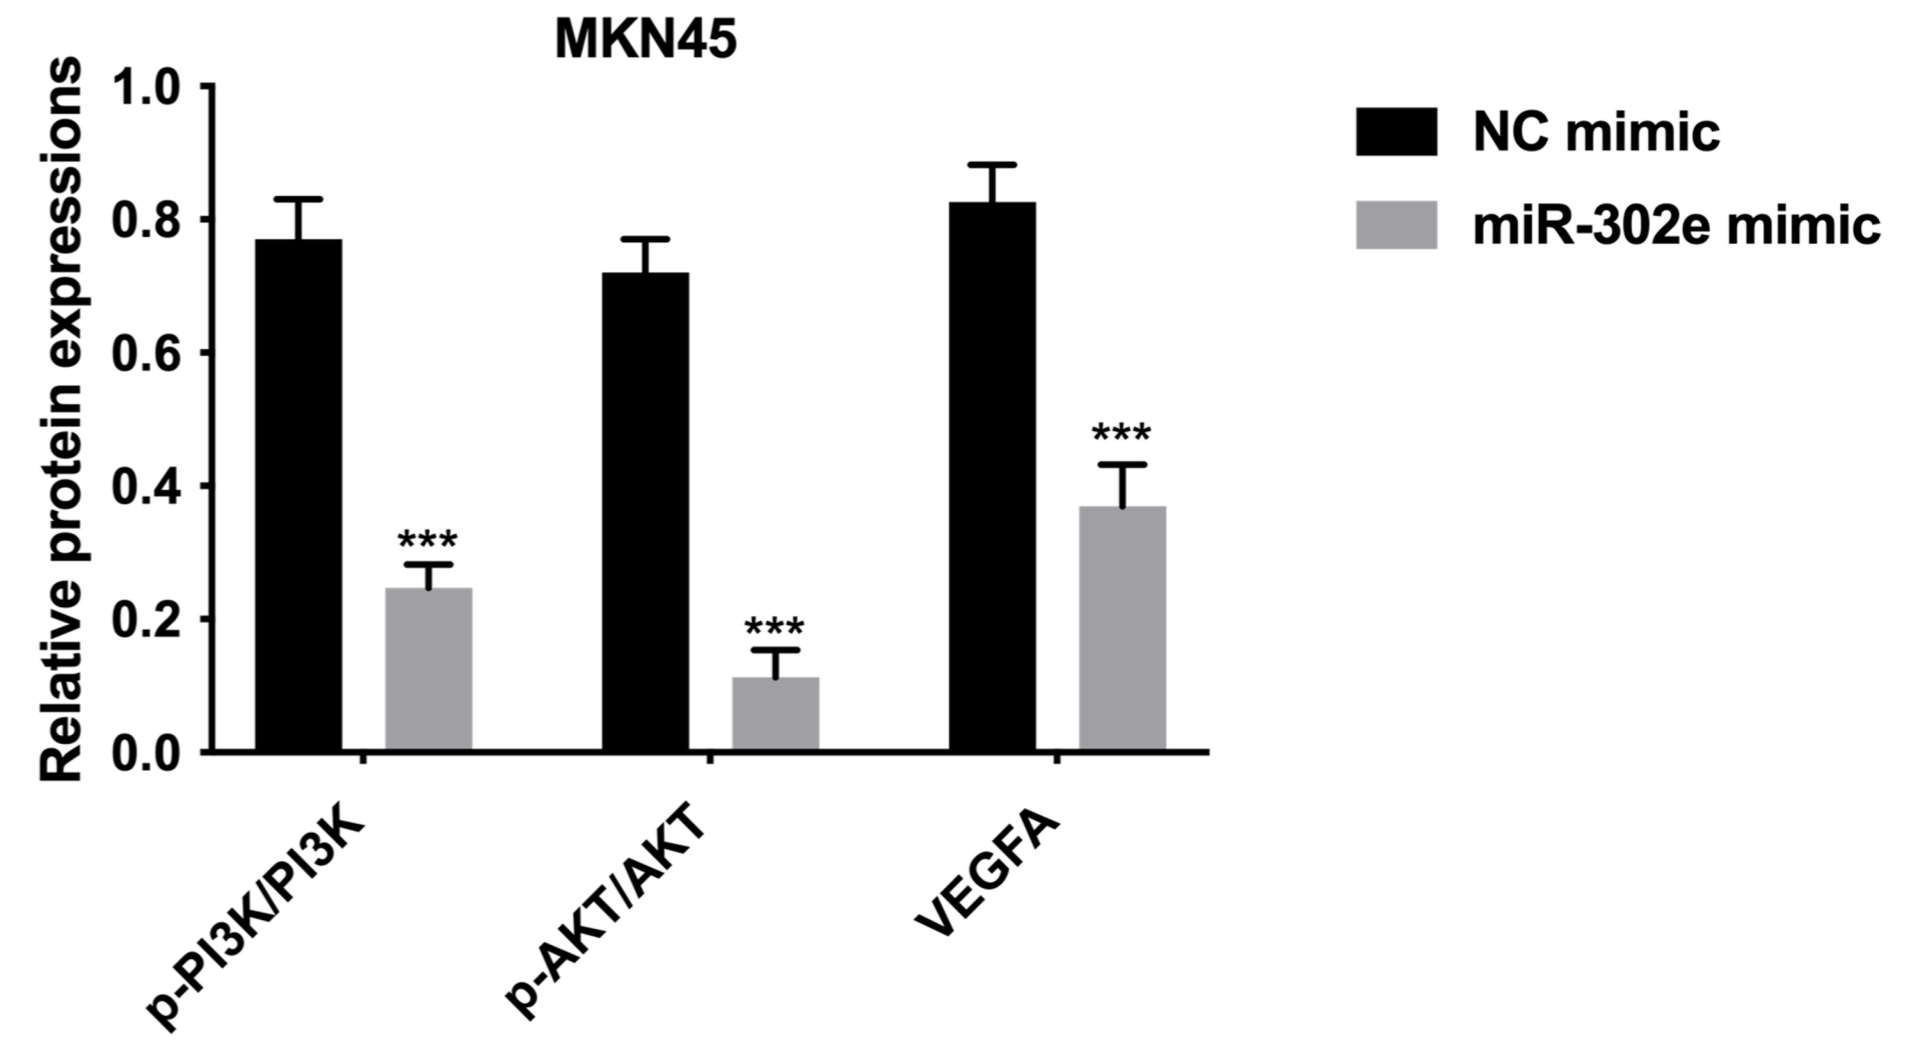

Supplement: jmb-34-7-1433-supple.pdf [file jmb-34-7-1433-supple.pdf]
